# Supplementary material for: Research on the Satisfaction of Beijing Waterfront Green Space Landscape Based on Social Media Data
Source: MDPI journal article supplement (doi:10.3390/land11101849), 2022-10-20
Supplement: s1 [file s1]

**Table S1.** List of 85 riverside parks in blue-green space.

| District           | Name of park             | Type of park        | River system             | Score |
|--------------------|--------------------------|---------------------|--------------------------|-------|
| Chaoyang District  | Olympic Forest Park      | Comprehensive parks | North Canal River System | 4.86  |
| Chaoyang District  | Chaoyang Park            | Comprehensive parks | North Canal River System | 4.86  |
| Chaoyang District  | Beijing Wenyu River Park | Comprehensive parks | North Canal River System | 4.89  |
| Chaoyang District  | Jiangfu Park             | Comprehensive parks | North Canal River System | 4.89  |
| Chaoyang District  | Red Scarf Park           | Comprehensive parks | North Canal River System | 4.83  |
| Chaoyang District  | Majiawan Wetland Park    | Ecological parks    | North Canal River System | 4.90  |
| Chaoyang District  | Qingfeng Park            | Comprehensive parks | North Canal River System | 4.85  |
| Chaoyang District  | Side Park                | Comprehensive parks | North Canal River System | 4.87  |
| Chaoyang District  | Jintian Park             | Ecological parks    | North Canal River System | 4.75  |
| Chaoyang District  | Dongba Qianmu Lake Park  | Specific parks      | North Canal River System | 4.79  |
| Chaoyang District  | Bahe Changqing Garden    | Community parks     | North Canal River System | 4.80  |
| Chaoyang District  | Jiangtai Riverside Park  | Specific parks      | North Canal River System | 4.29  |
| Chaoyang District  | Pingfang Park            | Comprehensive parks | North Canal River System | 4.69  |
| Dongcheng District | Longtan Park             | Comprehensive parks | North Canal River System | 4.85  |
| Xicheng District   | Beijing Zoo              | Historical parks    | North Canal River System | 4.83  |
| Xicheng District   | Beihai Park              | Historical parks    | North Canal River System | 4.84  |
| Xicheng District   | Shichahai Park           | Historical parks    | North Canal River System | 4.74  |
| Xicheng District   | Taoranting Park          | Historical parks    | North Canal River System | 4.85  |
| Xicheng District   | Xihai Park               | Specific parks      | North Canal River System | 4.89  |
| Xicheng District   | Houhai Park              | Historical parks    | North Canal River System | 4.66  |
| Xicheng District   | Lotus River Park         | Community parks     | North Canal River System | 4.80  |
| Haidian District   | The Summer Palace        | Historical parks    | North Canal River System | 4.79  |
| Haidian District   | Yuyuantan Park           | Historical parks    | North Canal River System | 4.84  |
| Haidian District   | Yuanmingyuan Relic Park  | Historical parks    | North Canal River System | 4.84  |

|                   |                                                     |                     |                          |      |
|-------------------|-----------------------------------------------------|---------------------|--------------------------|------|
| Haidian District  | The Black Bamboo Park                               | Historical parks    | North Canal River System | 4.83 |
| Haidian District  | Haidian Park                                        | Comprehensive parks | North Canal River System | 4.83 |
| Haidian District  | Daoxiang Lake Natural Wetland Park                  | Ecological parks    | North Canal River System | 4.77 |
| Haidian District  | Cuihu Wetland Park                                  | Specific parks      | North Canal River System | 4.75 |
| Haidian District  | South River Park                                    | Community parks     | North Canal River System | 4.81 |
| Haidian District  | Tayuan City Forest Park                             | Specific parks      | North Canal River System | 4.80 |
| Tongzhou District | Grand Canal Forest Park                             | Ecological parks    | North Canal River System | 4.89 |
| Tongzhou District | Dongjiao Wetland Park                               | Ecological parks    | North Canal River System | 4.90 |
| Tongzhou District | Dongjiao Forest Park                                | Ecological parks    | North Canal River System | 4.80 |
| Tongzhou District | Tongzhou Canal Park                                 | Ecological parks    | North Canal River System | 4.82 |
| Tongzhou District | City Green Heart Forest Park                        | Comprehensive parks | North Canal River System | 4.90 |
| Tongzhou District | Xihaizi Park                                        | Specific parks      | North Canal River System | 4.85 |
| Tongzhou District | Taihu Park                                          | Ecological parks    | North Canal River System | 4.90 |
| Tongzhou District | Business Fujin Park                                 | Comprehensive parks | North Canal River System | 4.50 |
| Tongzhou District | Wenyu Riverside Forest Park                         | Specific parks      | North Canal River System | 4.18 |
| Daxing District   | Nanhaizi Park                                       | Comprehensive parks | North Canal River System | 4.89 |
| Daxing District   | Yizhuang New Town Riverside Forest Park             | Ecological parks    | North Canal River System | 4.90 |
| Daxing District   | Tongming Lake Park                                  | Community parks     | North Canal River System | 4.90 |
| Daxing District   | Wangxing Lake Country Park                          | Specific parks      | North Canal River System | 4.85 |
| Daxing District   | Kangzhuang Park                                     | Comprehensive parks | North Canal River System | 4.77 |
| Daxing District   | Bihai Park                                          | Specific parks      | North Canal River System | 4.71 |
| Daxing District   | New West Fengqu Wetland Park                        | Specific parks      | North Canal River System | 4.70 |
| Daxing District   | Xihongmen Starlight Ecological Culture Leisure Park | Comprehensive parks | North Canal River System | 4.77 |

|                      |                                                 |                     |                          |      |
|----------------------|-------------------------------------------------|---------------------|--------------------------|------|
| Daxing District      | Daxing Ecological Civilization Education Park   | Specific parks      | North Canal River System | 4.81 |
| Fengtai District     | Lotus Pond Park                                 | Historical parks    | North Canal River System | 4.84 |
| Fengtai District     | Nanyuan Forest Wetland Park                     | Ecological parks    | North Canal River System | 4.80 |
| Fengtai District     | Fuhai Park                                      | Gardens             | North Canal River System | 4.15 |
| Changping District   | Changping New City Riverside Forest Park        | Ecological parks    | North Canal River System | 4.89 |
| Changping District   | Future Science City Waterfront Park             | Ecological parks    | North Canal River System | 4.86 |
| Changping District   | Wenyu River Baigezhuang Ecological Wetland Park | Ecological parks    | North Canal River System | 4.78 |
| Haidian District     | Pingzhuang Country Park                         | Specific parks      | Yongding River System    | 3.92 |
| Fengtai District     | Beijing Garden Expo Park                        | Specific parks      | Yongding River System    | 4.74 |
| Fengtai District     | Green dam Park                                  | Specific parks      | Yongding River System    | 4.77 |
| Daxing District      | Beijing Wild Animal Park                        | Specific parks      | Yongding River System    | 4.83 |
| Daxing District      | Niantan Park                                    | Comprehensive parks | Yongding River System    | 4.87 |
| Daxing District      | Langfa Urban Forest Park                        | Specific parks      | Yongding River System    | 4.70 |
| Shijingshan District | Shougang Park                                   | Specific parks      | Yongding River System    | 4.89 |
| Shijingshan District | Yongding River Leisure Forest Park              | Ecological parks    | Yongding River System    | 4.78 |
| Shijingshan District | Beijing Winter Olympic Park                     | Comprehensive parks | Yongding River System    | 4.79 |
| Shijingshan District | Lianshi Lake Park                               | Ecological parks    | Yongding River System    | 4.28 |
| Shijingshan District | Shijingshan Sculpture Park                      | Specific parks      | Yongding River System    | 4.28 |
| Mentougou District   | Yongding River Park                             | Comprehensive parks | Yongding River System    | 4.78 |
| Mentougou District   | Mencheng Lake Park                              | Specific parks      | Yongding River System    | 4.81 |
| Mentougou District   | Jinglang Island Park                            | Specific parks      | Yongding River System    | 4.77 |
| Mentougou District   | Sanjiadian Pucao Wetland Park                   | Ecological parks    | Yongding River System    | 4.60 |
| Mentougou District   | Riverside Century Square Park                   | Comprehensive parks | Yongding River System    | 4.71 |

|                    |                                       |                     |                       |      |
|--------------------|---------------------------------------|---------------------|-----------------------|------|
| Mentougou District | Jingxi Eighteen Pools                 | Nature parks        | Yongding River System | 3.95 |
| Mentougou District | Pearl lake                            | Nature parks        | Yongding River System | 3.96 |
| Yanqing District   | Yeyahu National Wetland Park          | Nature parks        | Yongding River System | 4.72 |
| Fangshan District  | Shidu Scenic Area                     | Nature parks        | Daqing River System   | 4.74 |
| Fangshan District  | Changyang Park                        | Comprehensive parks | Daqing River System   | 4.87 |
| Fangshan District  | Niukouyu Wetland Park                 | Ecological parks    | Daqing River System   | 4.89 |
| Fangshan District  | Liuli River Wetland Park              | Ecological parks    | Daqing River System   | 4.23 |
| Fengtai District   | Qinglonghu Park                       | Ecological parks    | Daqing River System   | 4.49 |
| Shunyi District    | Hanshiqiao Wetland Park               | Ecological parks    | Chaobai River System  | 4.28 |
| Shunyi District    | Shunyi Olympic Water Park             | Specific parks      | Chaobai River System  | 4.75 |
| Shunyi District    | Chaobai River Cross-country Park      | Ecological parks    | Chaobai River System  | 4.76 |
| Pinggu District    | Beijing Jinhai Lake Scenic Area       | Nature parks        | Jiyun River System    | 4.64 |
| Pinggu District    | Pinggu Wetland Park                   | Ecological parks    | Jiyun River System    | 4.79 |
| Pinggu District    | Xiaolong River Park                   | Nature parks        | Jiyun River System    | 4.71 |
| Pinggu District    | Pinggu New Town Riverside Forest Park | Ecological parks    | Jiyun River System    | 4.60 |

**Table S2.** IPA list of riverside parks beside different river systems based on landscape design.

| Indicators | Parks beside the North |       | Parks beside the      |       | Parks beside the Daqing |       | Parks beside the Chaobai |       | Parks beside the Jiyun |       |
|------------|------------------------|-------|-----------------------|-------|-------------------------|-------|--------------------------|-------|------------------------|-------|
|            | Canal River System     |       | Yongding River System |       | River System            |       | River System             |       | River System           |       |
|            | Imp.                   | Sat.  | Imp.                  | Sat.  | Imp.                    | Sat.  | Imp.                     | Sat.  | Imp.                   | Sat.  |
| A1         | 0.081                  | 0.727 | 0.068                 | 0.710 | 0.124                   | 0.575 | 0.094                    | 0.757 | 0.125                  | 0.607 |
| A2         | 0.081                  | 0.730 | 0.035                 | 0.661 | 0.034                   | 0.647 | 0.053                    | 0.726 | 0.036                  | 0.563 |
| A3         | 0.122                  | 0.673 | 0.145                 | 0.732 | 0.047                   | 0.614 | 0.049                    | 0.696 | 0.030                  | 0.529 |

|    |       |       |       |       |       |       |       |       |       |       |
|----|-------|-------|-------|-------|-------|-------|-------|-------|-------|-------|
| A4 | 0.135 | 0.720 | 0.105 | 0.628 | 0.240 | 0.539 | 0.164 | 0.660 | 0.224 | 0.530 |
| A5 | 0.112 | 0.785 | 0.040 | 0.679 | 0.014 | 0.570 | 0.005 | 0.632 | 0.021 | 0.558 |
| B1 | 0.006 | 0.541 | 0.002 | 0.554 | 0.001 | 0.444 | 0.001 | 0.539 | 0.001 | 0.333 |
| B2 | 0.046 | 0.694 | 0.017 | 0.622 | 0.076 | 0.564 | 0.090 | 0.750 | 0.125 | 0.561 |
| B3 | 0.047 | 0.727 | 0.038 | 0.694 | 0.062 | 0.599 | 0.044 | 0.685 | 0.032 | 0.545 |
| B4 | 0.040 | 0.731 | 0.027 | 0.634 | 0.018 | 0.652 | 0.055 | 0.682 | 0.011 | 0.601 |
| C1 | 0.073 | 0.745 | 0.146 | 0.707 | 0.079 | 0.563 | 0.063 | 0.632 | 0.088 | 0.543 |
| C2 | 0.047 | 0.687 | 0.066 | 0.615 | 0.077 | 0.496 | 0.090 | 0.665 | 0.061 | 0.481 |
| C3 | 0.009 | 0.715 | 0.023 | 0.762 | 0.009 | 0.554 | 0.011 | 0.593 | 0.012 | 0.564 |
| C4 | 0.010 | 0.704 | 0.021 | 0.661 | 0.013 | 0.464 | 0.018 | 0.607 | 0.011 | 0.528 |
| D1 | 0.080 | 0.672 | 0.073 | 0.657 | 0.097 | 0.483 | 0.117 | 0.650 | 0.103 | 0.412 |
| D2 | 0.069 | 0.698 | 0.135 | 0.644 | 0.070 | 0.476 | 0.097 | 0.627 | 0.092 | 0.415 |
| D3 | 0.037 | 0.703 | 0.052 | 0.682 | 0.039 | 0.502 | 0.047 | 0.661 | 0.029 | 0.501 |
| D4 | 0.005 | 0.746 | 0.007 | 0.730 | 0.001 | 0.559 | 0.003 | 0.723 | 0.001 | 0.444 |

**Table S3.** IPA list of riverside parks beside different river systems based on sensory perception.

| Indicators | Parks beside the North |       | Parks beside the Yongding |       | Parks beside the Daqing |       | Parks beside the Chaobai |       | Parks beside the Jiyun |       |
|------------|------------------------|-------|---------------------------|-------|-------------------------|-------|--------------------------|-------|------------------------|-------|
|            | Canal River System     |       | River System              |       | River System            |       | River System             |       | River System           |       |
|            | Imp.                   | Sat.  | Imp.                      | Sat.  | Imp.                    | Sat.  | Imp.                     | Sat.  | Imp.                   | Sat.  |
| E1         | 0.220                  | 0.757 | 0.142                     | 0.672 | 0.037                   | 0.599 | 0.037                    | 0.617 | 0.065                  | 0.567 |
| E2         | 0.136                  | 0.732 | 0.054                     | 0.657 | 0.066                   | 0.586 | 0.017                    | 0.704 | 0.072                  | 0.563 |
| E3         | 0.259                  | 0.724 | 0.244                     | 0.604 | 0.454                   | 0.514 | 0.550                    | 0.621 | 0.552                  | 0.533 |
| E4         | 0.184                  | 0.682 | 0.125                     | 0.661 | 0.123                   | 0.525 | 0.059                    | 0.665 | 0.049                  | 0.559 |
| E5         | 0.018                  | 0.638 | 0.036                     | 0.610 | 0.025                   | 0.456 | 0.025                    | 0.628 | 0.019                  | 0.396 |
| E6         | 0.009                  | 0.698 | 0.017                     | 0.627 | 0.056                   | 0.680 | 0.008                    | 0.680 | 0.015                  | 0.537 |

|    |       |       |       |       |       |       |       |       |       |       |
|----|-------|-------|-------|-------|-------|-------|-------|-------|-------|-------|
| F1 | 0.022 | 0.683 | 0.011 | 0.686 | 0.016 | 0.542 | 0.023 | 0.690 | 0.010 | 0.619 |
| F2 | 0.006 | 0.792 | 0.034 | 0.874 | 0.001 | 0.692 | 0.002 | 0.833 | 0.006 | 0.587 |
| F3 | 0.002 | 0.784 | 0.002 | 0.732 | 0.006 | 0.516 | 0.001 | 0.750 | 0.001 | 0.563 |
| F4 | 0.001 | 0.709 | 0.001 | 0.626 | 0.002 | 0.511 | 0.001 | 0.500 | 0.002 | 0.500 |
| F5 | 0.003 | 0.667 | 0.004 | 0.643 | 0.003 | 0.508 | 0.002 | 0.600 | 0.002 | 0.433 |
| G1 | 0.040 | 0.754 | 0.042 | 0.659 | 0.090 | 0.516 | 0.058 | 0.750 | 0.059 | 0.640 |
| G2 | 0.006 | 0.776 | 0.004 | 0.753 | 0.003 | 0.702 | 0.003 | 0.700 | 0.002 | 0.619 |
| H1 | 0.039 | 0.751 | 0.044 | 0.583 | 0.045 | 0.537 | 0.101 | 0.551 | 0.058 | 0.528 |
| H2 | 0.008 | 0.775 | 0.004 | 0.703 | 0.004 | 0.573 | 0.008 | 0.792 | 0.003 | 0.579 |
| H3 | 0.001 | 0.668 | 0.002 | 0.596 | 0.004 | 0.528 | 0.001 | 0.500 | 0.001 | 0.375 |
| H4 | 0.001 | 0.744 | 0.001 | 0.712 | 0.002 | 0.475 | 0.002 | 0.400 | 0.002 | 0.563 |
| H5 | 0.018 | 0.718 | 0.167 | 0.758 | 0.016 | 0.614 | 0.003 | 0.333 | 0.008 | 0.607 |
| H6 | 0.001 | 0.724 | 0.001 | 0.768 | 0.001 | 0.500 | 0.001 | 0.500 | 0.000 | 0.500 |
| L1 | 0.027 | 0.728 | 0.065 | 0.664 | 0.046 | 0.496 | 0.099 | 0.682 | 0.073 | 0.591 |

**Table S4.** Multiple comparison analysis of landscape design indicators of riverside parks beside different river systems.

| I                                             | J | A5                 |        | B3                 |        | C2                 |        | C4                 |        | D2                 |        |
|-----------------------------------------------|---|--------------------|--------|--------------------|--------|--------------------|--------|--------------------|--------|--------------------|--------|
|                                               |   | Mean Dif.<br>(I-J) | Sig.   |
| a (Parks beside the North Canal River System) | b | 0.1405*            | 0.0210 | 0.1116*            | 0.0090 | 0.1172*            | 0.0190 | 0.0695             | 0.3830 | 0.1278*            | 0.0060 |
|                                               | c | 0.0825             | 0.4330 | 0.1081             | 0.1430 | 0.1269             | 0.1410 | -0.0427            | 0.7590 | 0.1413             | 0.0770 |
|                                               | d | 0.0836             | 0.5310 | 0.0029             | 0.9750 | 0.0157             | 0.8850 | -0.0286            | 0.8710 | -0.0095            | 0.9240 |
|                                               | e | 0.3114*            | 0.0090 | 0.2318*            | 0.0050 | 0.0990             | 0.2990 | 0.3734*            | 0.0170 | 0.1862*            | 0.0360 |
|                                               | a | -0.1405*           | 0.0210 | -0.1116*           | 0.0090 | -0.1172*           | 0.0190 | -0.0695            | 0.3830 | -0.1278*           | 0.0060 |
|                                               | b | -0.0580            | 0.6080 | -0.0035            | 0.9650 | 0.0097             | 0.9160 | -0.1122            | 0.4540 | 0.0135             | 0.8730 |

|                                            |   |         |        |         |        |         |        |         |        |         |        |
|--------------------------------------------|---|---------|--------|---------|--------|---------|--------|---------|--------|---------|--------|
| b (Parks beside the Yongding River System) | d | -0.0569 | 0.6840 | -0.1087 | 0.2660 | -0.1015 | 0.3740 | -0.0981 | 0.5960 | -0.1373 | 0.1930 |
|                                            | e | 0.1709  | 0.1690 | 0.1203  | 0.1660 | -0.0182 | 0.8570 | 0.3039  | 0.0670 | 0.0584  | 0.5300 |
| c (Parks beside the Daqing River System)   | a | -0.0825 | 0.4330 | -0.1081 | 0.1430 | -0.1269 | 0.1410 | 0.0427  | 0.7590 | -0.1413 | 0.0770 |
|                                            | b | 0.0580  | 0.6080 | 0.0035  | 0.9650 | -0.0097 | 0.9160 | 0.1122  | 0.4540 | -0.0135 | 0.8730 |
|                                            | d | 0.0011  | 0.9950 | -0.1052 | 0.3590 | -0.1112 | 0.4070 | 0.0141  | 0.9480 | -0.1508 | 0.2240 |
|                                            | e | 0.2289  | 0.1320 | 0.1237  | 0.2410 | -0.0279 | 0.8210 | 0.4162* | 0.0400 | 0.0449  | 0.6920 |
| d (Parks beside the Chaobai River System)  | a | -0.0836 | 0.5310 | -0.0029 | 0.9750 | -0.0157 | 0.8850 | 0.0286  | 0.8710 | 0.0095  | 0.9240 |
|                                            | b | 0.0569  | 0.6840 | 0.1087  | 0.2660 | 0.1015  | 0.3740 | 0.0981  | 0.5960 | 0.1373  | 0.1930 |
|                                            | c | -0.0011 | 0.9950 | 0.1052  | 0.3590 | 0.1112  | 0.4070 | -0.0141 | 0.9480 | 0.1508  | 0.2240 |
|                                            | e | 0.2278  | 0.1870 | 0.2289  | 0.0590 | 0.0833  | 0.5520 | 0.4021  | 0.0800 | 0.1957  | 0.1320 |

\*a(Parks beside the North Canal River System); b(Parks beside the Yongding River System); c(Parks beside the Daqing River System); d(Parks beside the Chaobai River System); e(Parks beside the Jiyun River System).

**Table S5.** Multiple comparison analysis of sensory perception indicators of riverside parks beside different river systems.

| I                                             | J | E1                 |        | E4                 |        | E5                 |        | G2                 |        | H3                 |        |
|-----------------------------------------------|---|--------------------|--------|--------------------|--------|--------------------|--------|--------------------|--------|--------------------|--------|
|                                               |   | Mean Dif.<br>(I-J) | Sig.   |
| a (Parks beside the North Canal River System) | b | 0.1034*            | 0.0443 | 0.1219*            | 0.0058 | 0.1644*            | 0.0281 | 0.2204*            | 0.0106 | 0.2590*            | 0.0072 |
|                                               | c | 0.0575             | 0.5185 | 0.1301             | 0.0879 | 0.1099             | 0.3963 | -0.0674            | 0.6491 | 0.0017             | 0.9915 |
|                                               | d | 0.1784             | 0.1168 | 0.1459             | 0.1307 | -0.0613            | 0.7088 | 0.0112             | 0.9523 | 0.3402             | 0.1071 |
|                                               | e | 0.3138*            | 0.0020 | 0.1164             | 0.1669 | 0.0197             | 0.8904 | 0.1601             | 0.3305 | 0.4131*            | 0.0262 |
| b (Parks beside the Yongding River System)    | a | -0.1034*           | 0.0443 | -0.1219*           | 0.0058 | -0.1644*           | 0.0281 | -0.2204*           | 0.0106 | -0.2590*           | 0.0072 |
|                                               | b | -0.0459            | 0.6318 | 0.0082             | 0.9193 | -0.0546            | 0.6947 | -0.2878            | 0.0733 | -0.2573            | 0.1496 |
|                                               | d | 0.0750             | 0.5262 | 0.0240             | 0.8108 | -0.2257            | 0.1912 | -0.2092            | 0.2892 | 0.0811             | 0.7115 |
|                                               | e | 0.2104*            | 0.0471 | -0.0054            | 0.9513 | -0.1447            | 0.3427 | -0.0603            | 0.7291 | 0.1540             | 0.4285 |

|                                           |   |         |        |         |        |         |        |         |        |         |        |
|-------------------------------------------|---|---------|--------|---------|--------|---------|--------|---------|--------|---------|--------|
| c (Parks beside the Daqing River System)  | a | -0.0575 | 0.5185 | -0.1301 | 0.0879 | -0.1099 | 0.3963 | 0.0674  | 0.6491 | -0.0017 | 0.9915 |
|                                           | b | 0.0459  | 0.6318 | -0.0082 | 0.9193 | 0.0546  | 0.6947 | 0.2878  | 0.0733 | 0.2573  | 0.1496 |
|                                           | d | 0.1209  | 0.3854 | 0.0158  | 0.8935 | -0.1711 | 0.3977 | 0.0786  | 0.7339 | 0.3384  | 0.1916 |
|                                           | e | 0.2563* | 0.0473 | -0.0137 | 0.8997 | -0.0901 | 0.6272 | 0.2275  | 0.2858 | 0.4113  | 0.0852 |
| d (Parks beside the Chaobai River System) | a | -0.1784 | 0.1168 | -0.1459 | 0.1307 | 0.0613  | 0.7088 | -0.0112 | 0.9523 | -0.3402 | 0.1071 |
|                                           | b | -0.0750 | 0.5262 | -0.0240 | 0.8108 | 0.2257  | 0.1912 | 0.2092  | 0.2892 | -0.0811 | 0.7115 |
|                                           | c | -0.1209 | 0.3854 | -0.0158 | 0.8935 | 0.1711  | 0.3977 | -0.0786 | 0.7339 | -0.3384 | 0.1916 |
|                                           | e | 0.1354  | 0.3527 | -0.0295 | 0.8113 | 0.0810  | 0.7014 | 0.1489  | 0.5386 | 0.0729  | 0.7868 |

\*a(Parks beside the North Canal River System); b(Parks beside the Yongding River System); c(Parks beside the Daqing River System); d(Parks beside the Chaobai River System); e(Parks beside the Jiyun River System).

**Table S6.** IPA list of riverside parks in different types based on landscape design.

| Indicators | Comprehensive Parks |       | Community Parks |       | Historical Parks |       | Specific Parks |       | Gardens |       | Ecological Parks |       | Nature Parks |       |
|------------|---------------------|-------|-----------------|-------|------------------|-------|----------------|-------|---------|-------|------------------|-------|--------------|-------|
|            | Imp.                | Sat.  | Imp.            | Sat.  | Imp.             | Sat.  | Imp.           | Sat.  | Imp.    | Sat.  | Imp.             | Sat.  | Imp.         | Sat.  |
| A1         | 0.093               | 0.736 | 0.082           | 0.754 | 0.069            | 0.728 | 0.062          | 0.737 | 0.117   | 0.467 | 0.103            | 0.688 | 0.138        | 0.598 |
| A2         | 0.077               | 0.757 | 0.085           | 0.711 | 0.084            | 0.723 | 0.037          | 0.687 | 0.097   | 0.480 | 0.059            | 0.678 | 0.030        | 0.576 |
| A3         | 0.053               | 0.727 | 0.054           | 0.744 | 0.167            | 0.661 | 0.152          | 0.733 | 0.117   | 0.367 | 0.045            | 0.676 | 0.088        | 0.725 |
| A4         | 0.135               | 0.691 | 0.216           | 0.701 | 0.128            | 0.742 | 0.083          | 0.665 | 0.206   | 0.453 | 0.197            | 0.611 | 0.210        | 0.551 |
| A5         | 0.020               | 0.690 | 0.021           | 0.690 | 0.171            | 0.790 | 0.049          | 0.695 | 0.051   | 0.308 | 0.013            | 0.685 | 0.017        | 0.579 |
| B1         | 0.016               | 0.502 | 0.001           | 0.556 | 0.003            | 0.629 | 0.003          | 0.551 | 0.000   | 0.000 | 0.001            | 0.607 | 0.000        | 0.643 |
| B2         | 0.068               | 0.704 | 0.013           | 0.796 | 0.028            | 0.661 | 0.012          | 0.654 | 0.008   | 1.000 | 0.086            | 0.699 | 0.077        | 0.555 |
| B3         | 0.069               | 0.726 | 0.066           | 0.733 | 0.035            | 0.729 | 0.036          | 0.712 | 0.074   | 0.263 | 0.050            | 0.675 | 0.054        | 0.629 |
| B4         | 0.088               | 0.744 | 0.121           | 0.740 | 0.016            | 0.698 | 0.019          | 0.638 | 0.047   | 0.500 | 0.046            | 0.694 | 0.033        | 0.626 |
| C1         | 0.080               | 0.731 | 0.063           | 0.691 | 0.069            | 0.760 | 0.156          | 0.717 | 0.097   | 0.480 | 0.073            | 0.656 | 0.090        | 0.584 |



|    |       |       |       |       |       |       |       |       |       |       |       |       |       |       |
|----|-------|-------|-------|-------|-------|-------|-------|-------|-------|-------|-------|-------|-------|-------|
| C2 | 0.079 | 0.679 | 0.101 | 0.767 | 0.023 | 0.705 | 0.062 | 0.630 | 0.019 | 0.200 | 0.105 | 0.629 | 0.049 | 0.494 |
| C3 | 0.008 | 0.665 | 0.008 | 0.603 | 0.009 | 0.760 | 0.025 | 0.779 | 0.000 | 0.000 | 0.015 | 0.602 | 0.009 | 0.617 |
| C4 | 0.009 | 0.715 | 0.005 | 0.781 | 0.011 | 0.705 | 0.023 | 0.666 | 0.008 | 0.000 | 0.009 | 0.607 | 0.012 | 0.520 |
| D1 | 0.098 | 0.682 | 0.059 | 0.759 | 0.074 | 0.663 | 0.071 | 0.670 | 0.051 | 0.308 | 0.087 | 0.634 | 0.082 | 0.458 |
| D2 | 0.058 | 0.652 | 0.048 | 0.718 | 0.078 | 0.715 | 0.146 | 0.650 | 0.074 | 0.421 | 0.062 | 0.619 | 0.083 | 0.483 |
| D3 | 0.045 | 0.668 | 0.054 | 0.747 | 0.031 | 0.737 | 0.056 | 0.690 | 0.031 | 0.000 | 0.047 | 0.628 | 0.024 | 0.535 |
| D4 | 0.003 | 0.682 | 0.004 | 0.821 | 0.006 | 0.765 | 0.009 | 0.734 | 0.004 | 0.000 | 0.002 | 0.685 | 0.001 | 0.565 |

**Table S7.** IPA list of riverside parks in different types based on sensory perception.

| Indicators | Comprehensive Parks |       | Community Parks |       | Historical Parks |       | Specific Parks |       | Gardens |       | Ecological Parks |       | Nature Parks |       |
|------------|---------------------|-------|-----------------|-------|------------------|-------|----------------|-------|---------|-------|------------------|-------|--------------|-------|
|            | Imp.                | Sat.  | Imp.            | Sat.  | Imp.             | Sat.  | Imp.           | Sat.  | Imp.    | Sat.  | Imp.             | Sat.  | Imp.         | Sat.  |
| E1         | 0.107               | 0.647 | 0.074           | 0.667 | 0.277            | 0.774 | 0.173          | 0.681 | 0.134   | 0.350 | 0.054            | 0.661 | 0.045        | 0.702 |
| E2         | 0.163               | 0.769 | 0.144           | 0.712 | 0.129            | 0.715 | 0.060          | 0.694 | 0.114   | 0.529 | 0.092            | 0.675 | 0.048        | 0.580 |
| E3         | 0.321               | 0.697 | 0.444           | 0.706 | 0.216            | 0.742 | 0.206          | 0.665 | 0.315   | 0.447 | 0.459            | 0.632 | 0.448        | 0.495 |
| E4         | 0.113               | 0.750 | 0.105           | 0.746 | 0.220            | 0.667 | 0.098          | 0.716 | 0.195   | 0.379 | 0.102            | 0.635 | 0.182        | 0.577 |
| E5         | 0.022               | 0.651 | 0.007           | 0.625 | 0.017            | 0.622 | 0.039          | 0.617 | 0.013   | 0.000 | 0.020            | 0.622 | 0.020        | 0.459 |
| E6         | 0.020               | 0.685 | 0.041           | 0.721 | 0.002            | 0.746 | 0.012          | 0.660 | 0.013   | 0.500 | 0.028            | 0.632 | 0.053        | 0.671 |
| F1         | 0.022               | 0.636 | 0.021           | 0.732 | 0.022            | 0.696 | 0.014          | 0.707 | 0.034   | 0.600 | 0.021            | 0.647 | 0.009        | 0.633 |
| F2         | 0.001               | 0.746 | 0.001           | 0.333 | 0.009            | 0.795 | 0.041          | 0.874 | 0.000   | 0.000 | 0.001            | 0.692 | 0.003        | 0.596 |
| F3         | 0.003               | 0.795 | 0.003           | 0.909 | 0.002            | 0.787 | 0.002          | 0.765 | 0.000   | 0.000 | 0.003            | 0.703 | 0.006        | 0.565 |
| F4         | 0.002               | 0.664 | 0.002           | 0.857 | 0.000            | 0.746 | 0.001          | 0.673 | 0.007   | 0.000 | 0.002            | 0.591 | 0.002        | 0.621 |
| F5         | 0.003               | 0.666 | 0.005           | 0.625 | 0.003            | 0.666 | 0.004          | 0.658 | 0.000   | 0.000 | 0.004            | 0.608 | 0.004        | 0.563 |
| G1         | 0.070               | 0.773 | 0.055           | 0.766 | 0.026            | 0.741 | 0.037          | 0.713 | 0.067   | 0.400 | 0.073            | 0.671 | 0.065        | 0.521 |
| G2         | 0.007               | 0.782 | 0.007           | 0.652 | 0.005            | 0.774 | 0.004          | 0.754 | 0.007   | 1.000 | 0.005            | 0.750 | 0.002        | 0.692 |

|    |       |       |       |       |       |       |       |       |       |       |       |       |       |       |
|----|-------|-------|-------|-------|-------|-------|-------|-------|-------|-------|-------|-------|-------|-------|
| H1 | 0.062 | 0.731 | 0.060 | 0.787 | 0.030 | 0.768 | 0.041 | 0.653 | 0.013 | 0.000 | 0.047 | 0.640 | 0.052 | 0.430 |
| H2 | 0.005 | 0.749 | 0.007 | 0.636 | 0.008 | 0.780 | 0.004 | 0.750 | 0.034 | 0.800 | 0.006 | 0.714 | 0.003 | 0.630 |
| H3 | 0.001 | 0.576 | 0.005 | 0.471 | 0.001 | 0.685 | 0.002 | 0.616 | 0.000 | 0.000 | 0.004 | 0.651 | 0.000 | 0.500 |
| H4 | 0.001 | 0.739 | 0.001 | 0.800 | 0.000 | 0.788 | 0.001 | 0.674 | 0.000 | 0.000 | 0.001 | 0.614 | 0.002 | 0.516 |
| H5 | 0.026 | 0.735 | 0.003 | 0.889 | 0.015 | 0.699 | 0.195 | 0.762 | 0.040 | 0.333 | 0.017 | 0.704 | 0.011 | 0.531 |
| H6 | 0.001 | 0.845 | 0.001 | 0.333 | 0.001 | 0.726 | 0.002 | 0.793 | 0.000 | 0.000 | 0.000 | 0.367 | 0.000 | 0.462 |
| L1 | 0.050 | 0.730 | 0.014 | 0.750 | 0.017 | 0.714 | 0.067 | 0.671 | 0.013 | 0.000 | 0.062 | 0.669 | 0.045 | 0.592 |

**Table S8.** Multiple comparison analysis of landscape design indicators of riverside parks in different types.

| I                                       | J | A2                 |        | A3                 |        | A5                 |        | D1                 |        | D2                 |        |
|-----------------------------------------|---|--------------------|--------|--------------------|--------|--------------------|--------|--------------------|--------|--------------------|--------|
|                                         |   | Mean Dif.<br>(I-J) | Sig.   |
| f<br>(Com-<br>prehe-<br>nsive<br>Parks) | g | 0.0264             | 0.7200 | 0.0032             | 0.9650 | -0.0089            | 1.0000 | -0.0324            | 0.6990 | -0.1115            | 0.2140 |
|                                         | h | -0.0242            | 0.6430 | -0.0365            | 0.4840 | -0.0555            | 0.9190 | -0.0135            | 0.8200 | -0.1135            | 0.0750 |
|                                         | i | 0.1272*            | 0.0040 | 0.1598*            | 0.0000 | 0.2169             | 0.0550 | 0.0547             | 0.2600 | 0.0691             | 0.1820 |
|                                         | j | 0.1004*            | 0.0160 | 0.0993*            | 0.0160 | 0.1501*            | 0.0450 | 0.0204             | 0.6590 | 0.0295             | 0.5500 |
|                                         | k | 0.0535             | 0.3930 | 0.0690             | 0.2710 | 0.3964             | 0.3560 | 0.2323*            | 0.0020 | 0.2312*            | 0.0030 |
| g<br>(Com-<br>munity<br>Parks)          | f | -0.0264            | 0.7200 | -0.0032            | 0.9650 | 0.0089             | 1.0000 | 0.0324             | 0.6990 | 0.1115             | 0.2140 |
|                                         | h | -0.0506            | 0.5250 | -0.0397            | 0.6180 | -0.0466            | 0.8490 | 0.0189             | 0.8350 | -0.0020            | 0.9830 |
|                                         | i | 0.1007             | 0.1740 | 0.1566*            | 0.0360 | 0.2259*            | 0.0280 | 0.0871             | 0.3000 | 0.1805*            | 0.0460 |
|                                         | j | 0.0739             | 0.3100 | 0.0961             | 0.1880 | 0.1591*            | 0.0080 | 0.0528             | 0.5230 | 0.1410             | 0.1120 |
|                                         | k | 0.0271             | 0.7550 | 0.0658             | 0.4490 | 0.4053             | 0.3410 | 0.2647*            | 0.0090 | 0.3426*            | 0.0020 |
| h                                       | f | 0.0242             | 0.6430 | 0.0365             | 0.4840 | 0.0555             | 0.9190 | 0.0135             | 0.8200 | 0.1135             | 0.0750 |
|                                         | g | 0.0506             | 0.5250 | 0.0397             | 0.6180 | 0.0466             | 0.8490 | -0.0189            | 0.8350 | 0.0020             | 0.9830 |
|                                         | i | 0.1514*            | 0.0050 | 0.1962*            | 0.0000 | 0.2724*            | 0.0070 | 0.0682             | 0.2520 | 0.1826*            | 0.0050 |

|                         |   |          |        |          |        |          |        |         |        |          |        |
|-------------------------|---|----------|--------|----------|--------|----------|--------|---------|--------|----------|--------|
| (Historical Parks)      | j | 0.1246*  | 0.0160 | 0.1358*  | 0.0090 | 0.2056*  | 0.0020 | 0.0339  | 0.5560 | 0.1430*  | 0.0220 |
|                         | k | 0.0777   | 0.2650 | 0.1055   | 0.1310 | 0.4519   | 0.2360 | 0.2458* | 0.0030 | 0.3447*  | 0.0000 |
| i<br>(Specific Parks)   | f | -0.1272* | 0.0040 | -0.1598* | 0.0000 | -0.2169  | 0.0550 | -0.0547 | 0.2600 | -0.0691  | 0.1820 |
|                         | g | -0.1007  | 0.1740 | -0.1566* | 0.0360 | -0.2259* | 0.0280 | -0.0871 | 0.3000 | -0.1805* | 0.0460 |
|                         | h | -0.1514* | 0.0050 | -0.1962* | 0.0000 | -0.2724* | 0.0070 | -0.0682 | 0.2520 | -0.1826* | 0.0050 |
|                         | j | -0.0268  | 0.5110 | -0.0605  | 0.1400 | -0.0668  | 0.9990 | -0.0343 | 0.4600 | -0.0395  | 0.4230 |
|                         | k | -0.0737  | 0.2410 | -0.0908  | 0.1490 | 0.1795   | 0.9880 | 0.1776* | 0.0140 | 0.1621*  | 0.0350 |
| j<br>(Ecological Parks) | f | -0.1004* | 0.0160 | -0.0993* | 0.0160 | -0.1501* | 0.0450 | -0.0204 | 0.6590 | -0.0295  | 0.5500 |
|                         | g | -0.0739  | 0.3100 | -0.0961  | 0.1880 | -0.1591* | 0.0080 | -0.0528 | 0.5230 | -0.1410  | 0.1120 |
|                         | h | -0.1246* | 0.0160 | -0.1358* | 0.0090 | -0.2056* | 0.0020 | -0.0339 | 0.5560 | -0.1430* | 0.0220 |
|                         | i | 0.0268   | 0.5110 | 0.0605   | 0.1400 | 0.0668   | 0.9990 | 0.0343  | 0.4600 | 0.0395   | 0.4230 |
|                         | k | -0.0469  | 0.4460 | -0.0303  | 0.6210 | 0.2463   | 0.8630 | 0.2119* | 0.0030 | 0.2016*  | 0.0080 |

\*f(Comprehensive Parks); g(Community Parks); h(Historical Parks); i(Specific Parks); j(Ecological Parks); k(Nature Parks).

**Table S9.** Multiple comparison analysis of sensory perception indicators of riverside parks in different types.

| I                          | J | E1                 |        | E3                 |        | E4                 |        | G1                 |        | H1                 |        |
|----------------------------|---|--------------------|--------|--------------------|--------|--------------------|--------|--------------------|--------|--------------------|--------|
|                            |   | Mean Dif.<br>(I-J) | Sig.   |
| f<br>(Comprehensive Parks) | g | 0.0002             | 1.0000 | -0.0284            | 0.7040 | 0.0166             | 0.8360 | -0.0012            | 0.9900 | -0.1144            | 0.0660 |
|                            | h | -0.0745            | 0.6330 | -0.0813            | 0.1260 | -0.0149            | 0.7930 | -0.0331            | 0.6170 | -0.0559            | 0.8550 |
|                            | i | 0.1285             | 0.3350 | 0.0605             | 0.1630 | 0.1680*            | 0.0010 | 0.1011             | 0.0640 | 0.0989             | 0.9210 |
|                            | j | 0.1081             | 0.2250 | 0.0532             | 0.2000 | 0.1186*            | 0.0090 | 0.0770             | 0.1390 | 0.0655             | 0.9360 |
| g                          | k | 0.2373             | 0.9690 | 0.2147*            | 0.0010 | 0.2731*            | 0.0000 | 0.2544*            | 0.0020 | 0.2204             | 0.8210 |
|                            | f | -0.0002            | 1.0000 | 0.0284             | 0.7040 | -0.0166            | 0.8360 | 0.0012             | 0.9900 | 0.1144             | 0.0660 |

|                         |   |          |        |          |        |          |        |          |        |          |        |
|-------------------------|---|----------|--------|----------|--------|----------|--------|----------|--------|----------|--------|
| (Community Parks)       | h | -0.0747  | 0.8750 | -0.0530  | 0.5120 | -0.0316  | 0.7170 | -0.0319  | 0.7520 | 0.0585   | 0.6030 |
|                         | i | 0.1283   | 0.4950 | 0.0888   | 0.2360 | 0.1514   | 0.0630 | 0.1023   | 0.2760 | 0.2132*  | 0.0450 |
|                         | j | 0.1078   | 0.5110 | 0.0816   | 0.2700 | 0.1019   | 0.2020 | 0.0781   | 0.3980 | 0.1799*  | 0.0030 |
|                         | k | 0.2371   | 0.9700 | 0.2431*  | 0.0070 | 0.2564*  | 0.0080 | 0.2556*  | 0.0230 | 0.3348   | 0.3660 |
| h<br>(Historical Parks) | f | 0.0745   | 0.6330 | 0.0813   | 0.1260 | 0.0149   | 0.7930 | 0.0331   | 0.6170 | 0.0559   | 0.8550 |
|                         | g | 0.0747   | 0.8750 | 0.0530   | 0.5120 | 0.0316   | 0.7170 | 0.0319   | 0.7520 | -0.0585  | 0.6030 |
|                         | i | 0.2030*  | 0.0220 | 0.1418*  | 0.0090 | 0.1829*  | 0.0020 | 0.1342*  | 0.0450 | 0.1548   | 0.3020 |
|                         | j | 0.1825*  | 0.0070 | 0.1345*  | 0.0100 | 0.1335*  | 0.0180 | 0.1100   | 0.0900 | 0.1214   | 0.0800 |
| i<br>(Specific Parks)   | k | 0.3118   | 0.8380 | 0.2960*  | 0.0000 | 0.2880*  | 0.0000 | 0.2875*  | 0.0020 | 0.2763   | 0.5820 |
|                         | f | -0.1285  | 0.3350 | -0.0605  | 0.1630 | -0.1680* | 0.0010 | -0.1011  | 0.0640 | -0.0989  | 0.9210 |
|                         | g | -0.1283  | 0.4950 | -0.0888  | 0.2360 | -0.1514  | 0.0630 | -0.1023  | 0.2760 | -0.2132* | 0.0450 |
|                         | h | -0.2030* | 0.0220 | -0.1418* | 0.0090 | -0.1829* | 0.0020 | -0.1342* | 0.0450 | -0.1548  | 0.3020 |
| j<br>(Ecological Parks) | j | -0.0205  | 1.0000 | -0.0073  | 0.8600 | -0.0494  | 0.2690 | -0.0242  | 0.6410 | -0.0333  | 1.0000 |
|                         | k | 0.1088   | 1.0000 | 0.1542*  | 0.0170 | 0.1051   | 0.1280 | 0.1533   | 0.0570 | 0.1215   | 0.9990 |
|                         | f | -0.1081  | 0.2250 | -0.0532  | 0.2000 | -0.1186* | 0.0090 | -0.0770  | 0.1390 | -0.0655  | 0.9360 |
|                         | g | -0.1078  | 0.5110 | -0.0816  | 0.2700 | -0.1019  | 0.2020 | -0.0781  | 0.3980 | -0.1799* | 0.0030 |
| k                       | h | -0.1825* | 0.0070 | -0.1345* | 0.0100 | -0.1335* | 0.0180 | -0.1100  | 0.0900 | -0.1214  | 0.0800 |
|                         | i | 0.0205   | 1.0000 | 0.0073   | 0.8600 | 0.0494   | 0.2690 | 0.0242   | 0.6410 | 0.0333   | 1.0000 |
|                         | k | 0.1293   | 1.0000 | 0.1615*  | 0.0110 | 0.1545*  | 0.0240 | 0.1774*  | 0.0250 | 0.1549   | 0.9820 |

\*f(Comprehensive Parks); g(Community Parks); h(Historical Parks); i(Specific Parks); j(Ecological Parks); k(Nature Parks).

**Table S10.** IPA list of riverside parks in different districts based on landscape design.

| Indicators | Parks in Six Central Districts |       | Parks in Districts of the Inner Suburbs |       | Parks in Districts of the Outer Suburbs |       |
|------------|--------------------------------|-------|-----------------------------------------|-------|-----------------------------------------|-------|
|            | Imp.                           | Sat.  | Imp.                                    | Sat.  | Imp.                                    | Sat.  |
| A1         | 0.078                          | 0.718 | 0.080                                   | 0.725 | 0.122                                   | 0.624 |

|    |       |       |       |       |       |       |
|----|-------|-------|-------|-------|-------|-------|
| A2 | 0.078 | 0.726 | 0.048 | 0.708 | 0.036 | 0.577 |
| A3 | 0.122 | 0.667 | 0.125 | 0.732 | 0.100 | 0.734 |
| A4 | 0.135 | 0.709 | 0.118 | 0.645 | 0.202 | 0.565 |
| A5 | 0.124 | 0.777 | 0.015 | 0.704 | 0.015 | 0.570 |
| B1 | 0.007 | 0.533 | 0.001 | 0.690 | 0.000 | 0.452 |
| B2 | 0.038 | 0.675 | 0.048 | 0.702 | 0.081 | 0.564 |
| B3 | 0.047 | 0.715 | 0.040 | 0.717 | 0.044 | 0.630 |
| B4 | 0.037 | 0.721 | 0.033 | 0.701 | 0.039 | 0.621 |
| C1 | 0.075 | 0.732 | 0.127 | 0.719 | 0.085 | 0.590 |
| C2 | 0.042 | 0.655 | 0.083 | 0.668 | 0.054 | 0.503 |
| C3 | 0.009 | 0.703 | 0.022 | 0.757 | 0.010 | 0.610 |
| C4 | 0.012 | 0.676 | 0.015 | 0.691 | 0.011 | 0.551 |
| D1 | 0.078 | 0.657 | 0.085 | 0.680 | 0.086 | 0.464 |
| D2 | 0.076 | 0.674 | 0.107 | 0.672 | 0.087 | 0.491 |
| D3 | 0.037 | 0.688 | 0.050 | 0.698 | 0.026 | 0.537 |
| D4 | 0.006 | 0.721 | 0.004 | 0.806 | 0.001 | 0.580 |

**Table S11.** IPA list of riverside parks in different districts based on sensory perception.

| Indicators | Parks in Six Central Districts |       | Parks in Districts of the Inner Suburbs |       | Parks in Districts of the Outer Suburbs |       |
|------------|--------------------------------|-------|-----------------------------------------|-------|-----------------------------------------|-------|
|            | Imp.                           | Sat.  | Imp.                                    | Sat.  | Imp.                                    | Sat.  |
| E1         | 0.242                          | 0.748 | 0.052                                   | 0.707 | 0.044                                   | 0.582 |
| E2         | 0.130                          | 0.729 | 0.071                                   | 0.701 | 0.059                                   | 0.587 |
| E3         | 0.248                          | 0.711 | 0.318                                   | 0.658 | 0.435                                   | 0.562 |
| E4         | 0.184                          | 0.677 | 0.104                                   | 0.695 | 0.208                                   | 0.580 |
| E5         | 0.018                          | 0.620 | 0.036                                   | 0.631 | 0.016                                   | 0.467 |

|    |       |       |       |       |       |       |
|----|-------|-------|-------|-------|-------|-------|
| E6 | 0.007 | 0.682 | 0.025 | 0.678 | 0.033 | 0.614 |
| F1 | 0.022 | 0.681 | 0.015 | 0.665 | 0.008 | 0.647 |
| F2 | 0.006 | 0.784 | 0.032 | 0.881 | 0.003 | 0.549 |
| F3 | 0.002 | 0.782 | 0.003 | 0.679 | 0.004 | 0.636 |
| F4 | 0.001 | 0.689 | 0.001 | 0.582 | 0.002 | 0.636 |
| F5 | 0.003 | 0.658 | 0.004 | 0.634 | 0.004 | 0.586 |
| G1 | 0.037 | 0.739 | 0.058 | 0.696 | 0.055 | 0.650 |
| G2 | 0.006 | 0.771 | 0.005 | 0.763 | 0.001 | 0.700 |
| H1 | 0.038 | 0.733 | 0.043 | 0.694 | 0.055 | 0.590 |
| H2 | 0.007 | 0.770 | 0.005 | 0.749 | 0.003 | 0.632 |
| H3 | 0.001 | 0.627 | 0.002 | 0.655 | 0.000 | 0.444 |
| H4 | 0.001 | 0.751 | 0.001 | 0.613 | 0.001 | 0.641 |
| H5 | 0.015 | 0.706 | 0.160 | 0.761 | 0.013 | 0.554 |
| H6 | 0.001 | 0.738 | 0.001 | 0.733 | 0.000 | 0.500 |
| L1 | 0.028 | 0.692 | 0.064 | 0.712 | 0.056 | 0.589 |

**Table S12.** Multiple comparison analysis of landscape design indicators of riverside parks in different districts.

| I                                           | J | B3              |        | C4              |        |
|---------------------------------------------|---|-----------------|--------|-----------------|--------|
|                                             |   | Mean Dif. (I-J) | Sig.   | Mean Dif. (I-J) | Sig.   |
| l (Parks in Six Central Districts)          | m | 0.0191          | 0.6039 | 0.0131          | 0.8442 |
|                                             | n | 0.1577*         | 0.0450 | 0.2949*         | 0.0391 |
| m (Parks in Districts of the Inner Suburbs) | l | -0.0191         | 0.6039 | -0.0131         | 0.8442 |
|                                             | n | 0.1387          | 0.0789 | 0.2818*         | 0.0497 |

\*l(Parks in Six Central Districts); m(Parks in Districts of the Inner Suburbs); n(Parks in Districts of the Outer Suburbs).

**Table S13.** Multiple comparison analysis of sensory perception indicators of riverside parks in different districts.

| I                                           | J | E2              |        | F1              |        | H3              |        |
|---------------------------------------------|---|-----------------|--------|-----------------|--------|-----------------|--------|
|                                             |   | Mean Dif. (I-J) | Sig.   | Mean Dif. (I-J) | Sig.   | Mean Dif. (I-J) | Sig.   |
| l (Parks in Six Central Districts)          | m | 0.0477          | 0.4868 | 0.1028*         | 0.0423 | 0.0759          | 0.7428 |
|                                             | n | 0.0717*         | 0.0215 | 0.1484          | 0.1622 | 0.3998*         | 0.0057 |
| m (Parks in Districts of the Inner Suburbs) | l | -0.0477         | 0.4868 | -0.0103*        | 0.0423 | -0.0759         | 0.7428 |
|                                             | n | 0.0240          | 0.8764 | 0.0457          | 0.6672 | 0.3239*         | 0.0206 |

\*l(Parks in Six Central Districts): m(Parks in Districts of the Inner Suburbs): n(Parks in Districts of the Outer Suburbs).
